# Supplementary material for: Thermal- and oxidation dual-responsive random copolymer self-assembly of nanostructures
Source: Royal Society of Chemistry journal article supplement (doi:10.1039/d3py01242e), 2024-01-01
Supplement: d3py01242e1.pdf [file d3py01242e1.pdf]

# Thermal-and Oxidation Dual Responsive Random Copolymer Self-assembly of Nanostructure

*Lan Lou<sup>a,+</sup>, Shiling Zhang<sup>a,+</sup>, Al-Hassan S. Mahdy<sup>a,b,d+</sup>, Meng Wang<sup>a</sup>, Kai Li<sup>c,\*</sup>, Qi  
Xing<sup>a,\*</sup>, Jin Geng<sup>a,\*</sup>*

<sup>a</sup> Shenzhen Institute of Advanced Technology, Chinese Academy of Sciences,  
Shenzhen 518055, China.

<sup>b</sup> University of Chinese Academy of Sciences, Beijing, China

<sup>c</sup> Department of Biomedical Engineering, Southern University of Science and  
Technology (SUSTech), Shenzhen, 518055 China

<sup>d</sup> Chemistry Department, Faculty of Science, South Valley University, Qena 83523,  
Egypt

<sup>+</sup>These authors contributed equally: L.L., S.Z. and A. S. M.

\*email: lik@sustech.edu.cn; q.xing@siat.ac.cn; jin.geng@siat.ac.cn

## Supporting Information

### Table of Contents

|                                                   |           |
|---------------------------------------------------|-----------|
| <b>I. Materials.....</b>                          | <b>S2</b> |
| <b>II. Methods.....</b>                           | <b>S2</b> |
| <b>III. Polymer Characterization.....</b>         | <b>S3</b> |
| <b>IV. Thermo-response Characterization .....</b> | <b>S8</b> |

|                                                      |            |
|------------------------------------------------------|------------|
| <b>V. Monomer reactivity ratios .....</b>            | <b>S8</b>  |
| <b>VI. Oxidation Characterization... ..</b>          | <b>S10</b> |
| <b>VII Oxidation of poly(DMA-<i>co</i>-NAT).....</b> | <b>S11</b> |
| <b>VIII. References .....</b>                        | <b>S13</b> |

## **I. Materials**

*N,N*-dimethylacrylamide (DMA, TCI, > 99.0%, stabilized with MEHQ) was filtered over a column of aluminum oxide (Aldrich, activated, basic, Brockmann I) before use to remove inhibitors. *N*-acryloylthiomorpholine (NAT) was synthesized as previously reported.<sup>1</sup> Unless otherwise specified, all chemicals and solvents were purchased commercially and used as received.

## **II. Methods**

### **1. Nuclear magnetic resonance (NMR) spectroscopy**

<sup>1</sup>H-NMR was performed on Bucker Adance III HD, 400 MHz spectrometer to determine the synthetic compounds, the monomer conversion rate and polymer composition. Dimethyl sulfoxide-*d*<sub>6</sub> (DMSO-*d*<sub>6</sub>), deuterium oxide (D<sub>2</sub>O) and deuterated chloroform (CDCl<sub>3</sub>) were used as solvents if not otherwise specified. All chemical shifts are reported in ppm ( $\delta$ ), referenced to the chemical shifts of residual solvent resonances.

### **2. Gel permeation chromatography (GPC)**

The molecular weights ( $M_w$ ) and  $M_w$  distribution of polymers synthesized were determined by GPC (Waters). GPC was equipped with a differential refractive index detector (RID), one guard column and two Phenomenex Phenogel columns (500, 104, and 106 Å porosity; 5  $\mu$ m bead size). Tetrahydrofuran (THF, 99.9%, HPLC) was used

as the eluents at 35 °C with a flow rate of 1 mL/min.<sup>2</sup> Poly(methyl methacrylate) (PMMA) standards (molecular weights from 6,000,000 to 162 g/mol) with narrow molecular weight distribution were used for calibration. Molecular weight of polymers synthesized in this paper was calculated by using the Mark–Houwink constants. Samples were filtered through 0.45 µm polytetrafluoroethylene (PTFE) filters prior to injection.

### **3. Concentration Measurements**

The concentration of encapsulated DOX was measured, and the standard concentration curve of DOX were obtained by UV/Vis spectra using a UV-1800 spectrometer (Shimadzu) using a quartz cuvette. The relative concentration of released DOX from nanoparticles was monitored by an analytical HPLC performed on a 1100 modular HPLC system (Agilent Technologies) coupled to a multi-wavelength and PL-ELSD-1000 detector and equipped with a Phenomenex Kinetex® 5 µm XB-C18 100 Å column (50 × 4.6 mm), with a flow rate of 1 mL/min.

### **4. DLS measurement**

DLS was performed on a ZetaSizer Nano ZS from Malvern, Herrenberg, Germany. Light scattered at the angle of 173° for size detection. All measurements were conducted assuming a material reflective index of 1.59 and dispersant reflective index of 1.33 (water) in semi-micro cuvette. The particle size was collected by using the effective diameter (Z-average) calculated from the cumulants method as spherical shape, or the main peak by the percentage of numbers counted. Every sample was equilibrated for 120 s at selected temperature and the measurement contained 13 runs for 3 times.

## **III. Polymer characterization**

### **General procedures of the RAFT polymerization**

The experimental procedure under a nitrogen atmosphere involved conducting a typical RAFT procedure with the following reaction conditions: [DMA]:[NAT]:[BPTA]:[VA-044] = 700:300:2:0.67. The procedure began by

charging a 10 mL glass vial with a magnetic stirring bar, containing DMA (0.14 mL, 138.78 mg, 1.4 mmol), NAT (94.34 mg, 0.6 mmol), RAFT (0.95 mg, 0.004 mmol), VA-044 (1.33 mmol, 0.43 mg, 20  $\mu$ L of a 21.6 mg/mL deionized H<sub>2</sub>O stock solution), and deionized H<sub>2</sub>O as the solvent (2 mL). The vial was then capped with a rubber septum and sealed with parafilm. The reaction mixture underwent degassing with N<sub>2</sub> in a 0 °C water bath for 30 minutes. Once degassing was complete, the polymerization tube was sealed under vacuum and placed in an oil bath at 60 °C for 1.5 hours. At predetermined time intervals, a 0.10 mL aliquot was withdrawn using an argon-purged syringe and needle and rapidly exposed to air. The sample was immediately analyzed by <sup>1</sup>H NMR (400 MHz, D<sub>2</sub>O) to determine the monomer conversion. The sample used for <sup>1</sup>H NMR analysis was then dried under reduced pressure to determine the number-average molecular weight ( $M_n$ ) and polydispersity by gel permeation chromatography (GPC) using tetrahydrofuran (THF) as the eluent at a flow rate of 1 mL/min.

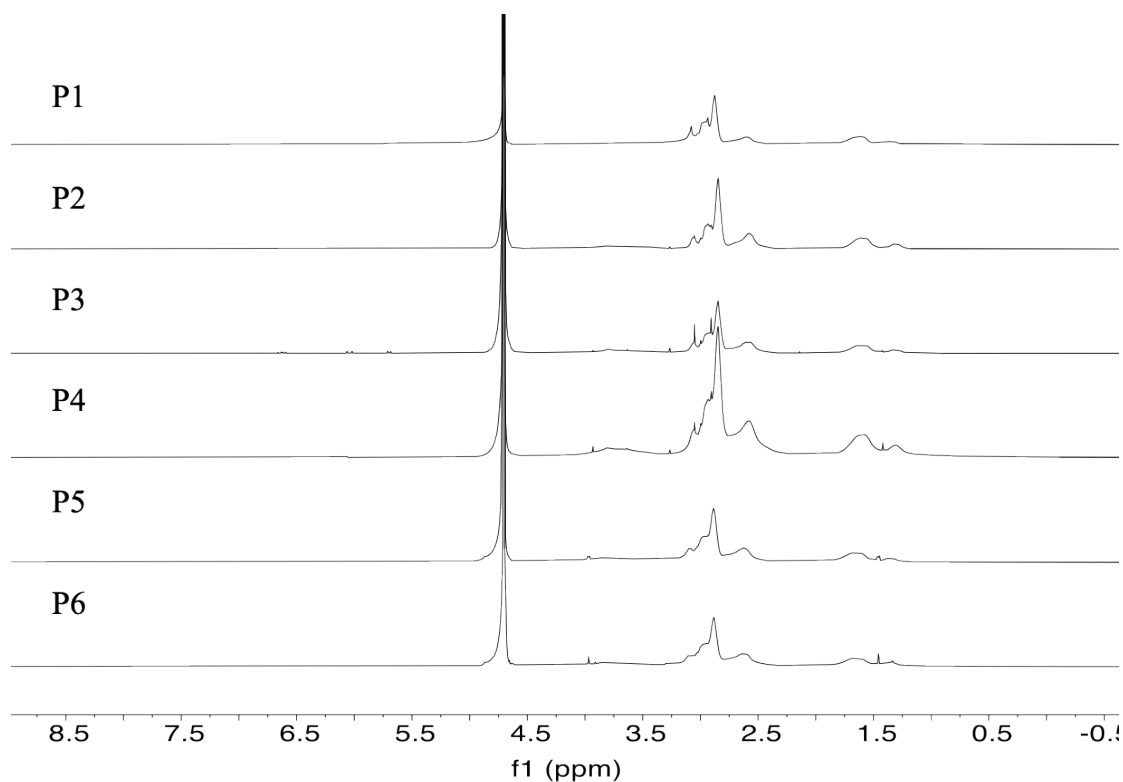

**Figure S1.** <sup>1</sup>H NMR spectra for the polymerization of P1 to P6 in D<sub>2</sub>O after 1.5 h reaction at 60 °C.

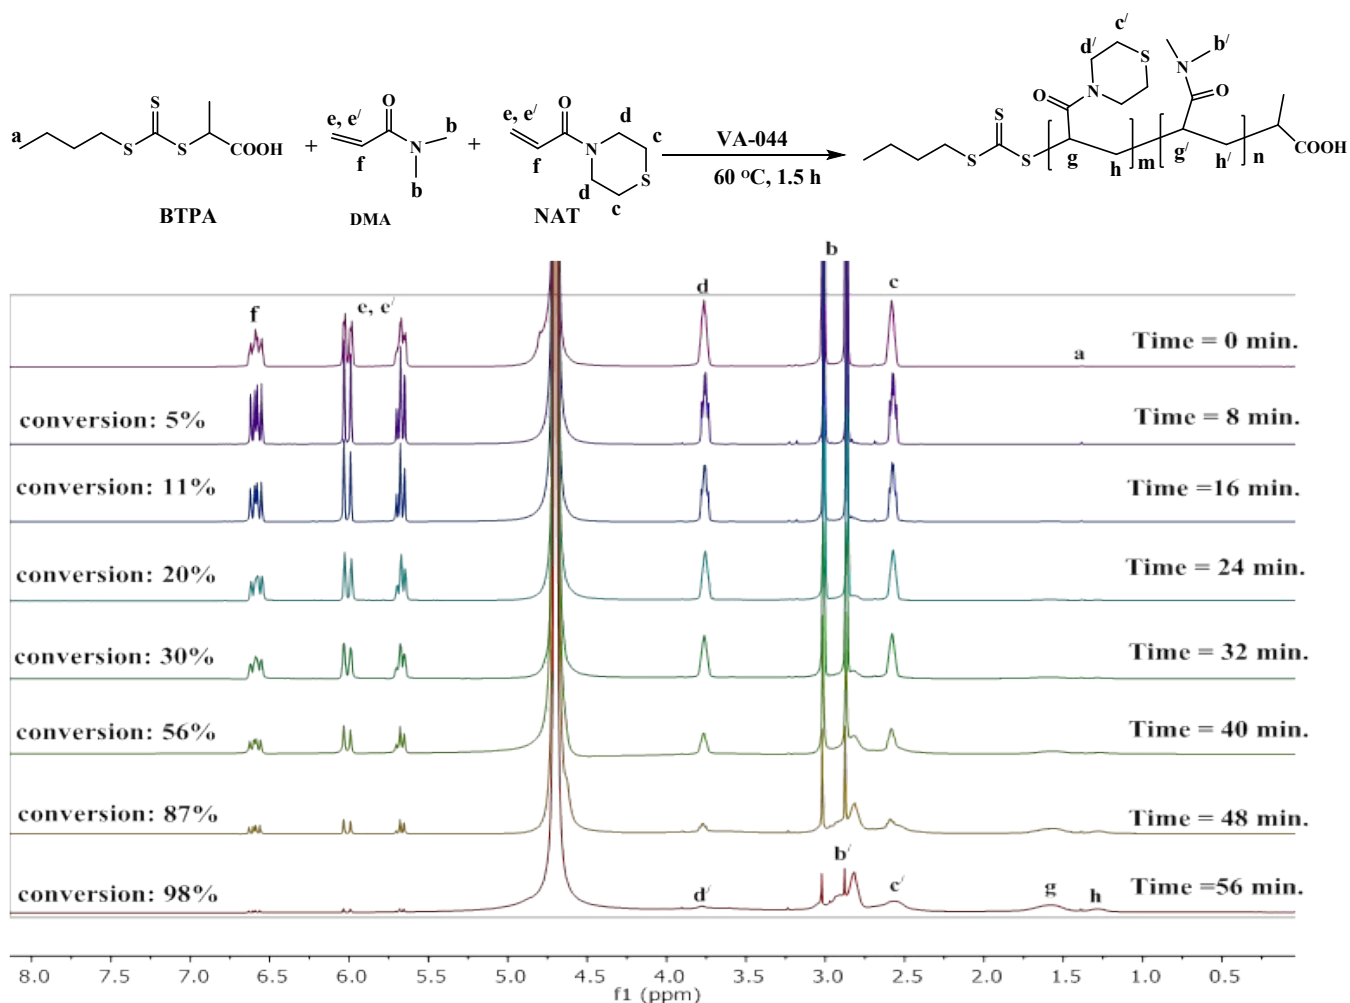

**Figure S2.** Monomer conversion monitored by <sup>1</sup>H NMR (in D<sub>2</sub>O) for the polymerization of P3 from 8 mins to 56 mins with 8 mins intervals.

**Table S1.** Characterization of the polymerization for P3 from 8 min to 56 min by <sup>1</sup>HNMR.

| Entry | DMA: NAT | RAFT: Monomers | Time   | Overall Conversion <sup>a</sup> |
|-------|----------|----------------|--------|---------------------------------|
| 1     | 7:3      | 1: 500         | 8 min  | 5 %                             |
| 2     | 7:3      | 1: 500         | 16 min | 11%                             |
| 3     | 7:3      | 1: 500         | 24 min | 20%                             |

|          |     |        |        |     |
|----------|-----|--------|--------|-----|
| <b>4</b> | 7:3 | 1: 500 | 32 min | 30% |
| <b>5</b> | 7:3 | 1:500  | 40 min | 56% |
| <b>6</b> | 7:3 | 1:500  | 48 min | 87% |
| <b>7</b> | 7:3 | 1:500  | 56 min | 98% |

<sup>a</sup> confirmed by <sup>1</sup>H NMR

**Table S2.** Overview of polymerization with different concentration of monomers with feed ratio of (NAT:DMA= 3:7) and reaction time for 1.5h, and characterization by <sup>1</sup>H NMR for the conversion.

| <b>Polymer</b> | <b>DMA:<br/>NAT</b> | <b>BTPA:<br/>Monomers</b> | <b>Solvent (H<sub>2</sub>O)<br/>volume<br/>(mL)</b> | <b>Conc. of<br/>monomers<br/>(M)</b> | <b>Overall<br/>Conversion<sup>a</sup></b> |
|----------------|---------------------|---------------------------|-----------------------------------------------------|--------------------------------------|-------------------------------------------|
| P15            | 7:3                 | 1:500                     | 2.5                                                 | 0.8                                  | >95%                                      |
| P16            | 7:3                 | 1:500                     | 1.5                                                 | 1.3                                  | >95%                                      |
| P17            | 7:3                 | 1:500                     | 1.25                                                | 1.6                                  | >95%                                      |

**Table S3.** overview of concentration, temperature and (co)solvent used for synthesis of polymers with feed ratio of (NAT:DMA= 3:7), and characterization by <sup>1</sup>H NMR, and DLS measurement.

| <b>Polymer</b> | <b>Temp.<br/>(°C)</b> | <b>Vol. of dioxane<br/>in solvent<br/>(dioxane: H<sub>2</sub>O)<br/>(%)</b> | <b>Conc. of<br/>monomers<br/>(M)</b> | <b>DMA:<br/>NAT</b> | <b>Overall<br/>Conversion<sup>a</sup></b> | <b>DLS (nm)</b>  |                      | <b>PDI</b> |
|----------------|-----------------------|-----------------------------------------------------------------------------|--------------------------------------|---------------------|-------------------------------------------|------------------|----------------------|------------|
|                |                       |                                                                             |                                      |                     |                                           | <b>Z-average</b> | <b>Main<br/>peak</b> |            |
| P10            | 50                    | 0                                                                           | 1                                    | 7:3                 | 0                                         | -----            | -----                | -----      |
| P11            | 80                    | 0                                                                           | 1                                    | 7:3                 | >95%                                      | 321              | 626                  | 0.38       |
| P12            | 60                    | 10                                                                          | 1                                    | 7:3                 | >95%                                      | 365              | 364                  | 0.90       |
| P13            | 60                    | 30                                                                          | 1                                    | 7:3                 | >95%                                      | 171              | 272                  | 0.29       |

|     |    |    |     |     |      |      |     |      |
|-----|----|----|-----|-----|------|------|-----|------|
| P14 | 60 | 50 | 1   | 7:3 | >95% | 782  | 294 | 0.96 |
| P15 | 60 | 0  | 0.8 | 7:3 | 90%  | 534  | 231 | 0.58 |
| P16 | 60 | 0  | 1.3 | 7:3 | >95% | 408  | 191 | 0.65 |
| P17 | 60 | 0  | 1.6 | 7:3 | >95% | 1783 | 158 | 1    |

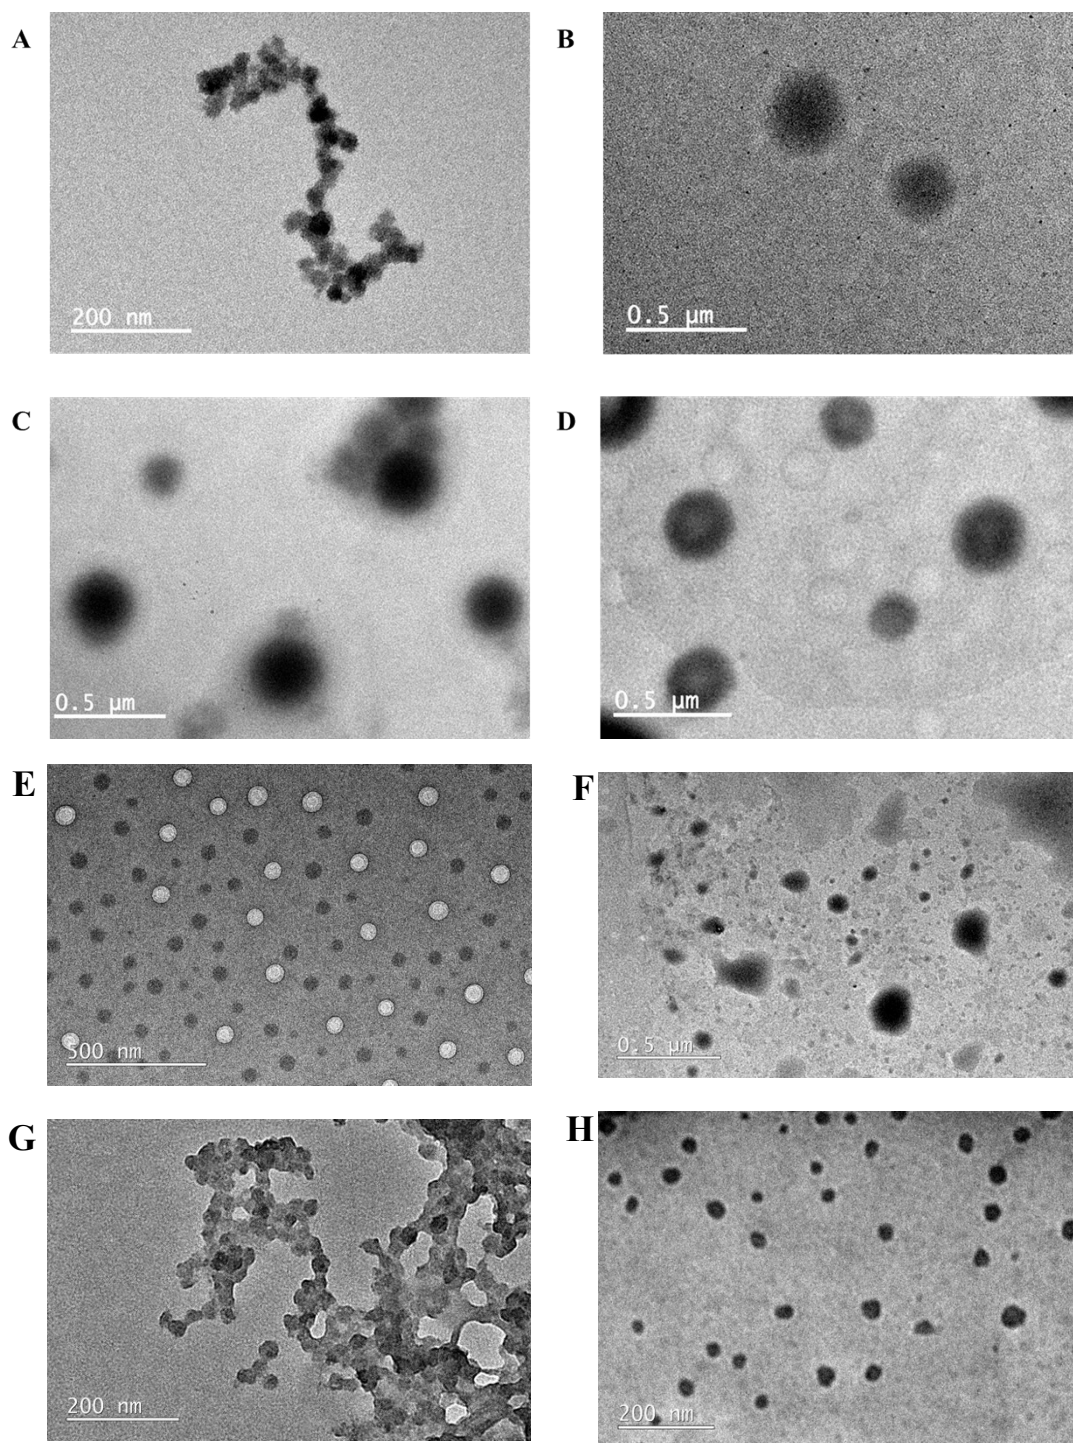

**Figure S3.** TEM image of random copolymers (A) P1, (B) P2, (C) P3, (D) P4, (E)

P11, (F) P12, (G) P13, and (H) P15.

## IV. Thermo-response Characterization

**Table S4.** DLS results for P3 at various temperature.

| Temperature (°C) | Main Peak<br>by Number% (nm) | Z-average (nm) | PDI   | Intercept |
|------------------|------------------------------|----------------|-------|-----------|
| 0                | 6.78                         | 141.2          | 0.883 | 0.908     |
| 5                | 9.492                        | 217.3          | 0.448 | 0.899     |
| 10               | 9.631                        | 152.1          | 0.803 | 0.922     |
| 15               | 13.58                        | 136.1          | 0.468 | 0.929     |
| 20               | 30.65                        | 67.76          | 0.41  | 0.913     |
| 25               | 127.2                        | 169.5          | 0.2   | 0.948     |
| 30               | 213.8                        | 331.7          | 0.222 | 0.892     |
| 35               | 301.2                        | 358.5          | 0.241 | 0.941     |
| 40               | 355.2                        | 337.9          | 0.022 | 0.814     |
| 45               | 311.8                        | 356.3          | 0.177 | 0.819     |
| 50               | 301.3                        | 356.6          | 0.139 | 0.805     |
| 55               | 244.8                        | 327.3          | 0.206 | 0.806     |
| 60               | 145.3                        | 323.2          | 0.206 | 0.786     |

## V. Monomer reactivity ratios

The monomer reactivity ratios can be calculated using an equation that follows the Fineman–Ross method (F-R).

$$G = r_1 H - r_2$$

Where:  $r_1$  and  $r_2$  are the reactivity ratios of the monomers DMA and NAT, respectively. The parameters of F-R method, as presented in Table S3, are defined as:

$$G = X(Y - 1) / Y, H = X^2 / Y, X = M_1 / M_2 \text{ and } Y = m_1 / m_2$$

$M_1$  and  $M_2$  are the monomer molar composition in feed and  $m_1$ ,  $m_2$  the copolymer molar composition. The reactivity ratios are determined according to the plots of the G versus H values. thus ( $r_1 = 0.52$  and  $r_2 = 0.63$ ).

**Table S5.** F-R parameters for DMA-NAT copolymers

| Entry      | Monomer               |                       | Copolymer <sup>a</sup> |                       | Parameters of F-R                |                                  |            |                     |
|------------|-----------------------|-----------------------|------------------------|-----------------------|----------------------------------|----------------------------------|------------|---------------------|
|            | DMA (M <sub>1</sub> ) | NAT (M <sub>2</sub> ) | DMA (m <sub>1</sub> )  | NAT (m <sub>2</sub> ) | X M <sub>1</sub> /M <sub>2</sub> | Y m <sub>1</sub> /m <sub>2</sub> | G X(Y-1)/Y | H X <sup>2</sup> /Y |
| <b>P2</b>  | 80                    | 20                    | 73                     | 27                    | 4                                | 2.7                              | 2.51       | 5.92                |
| <b>P3</b>  | 70                    | 30                    | 64                     | 36                    | 2.33                             | 1.77                             | 1.01       | 3.06                |
| <b>P7</b>  | 60                    | 40                    | 57                     | 43                    | 1.50                             | 1.32                             | 0.36       | 1.70                |
| <b>P8</b>  | 50                    | 50                    | 51                     | 49                    | 1                                | 1.04                             | 0.038      | 0.96                |
| <b>P20</b> | 40                    | 60                    | 38                     | 62                    | 0.66                             | 0.61                             | -0.35      | 0.71                |
| <b>P21</b> | 30                    | 70                    | 28                     | 72                    | 0.42                             | 0.35                             | -0.78      | 0.46                |

<sup>a</sup> By <sup>1</sup>H NMR

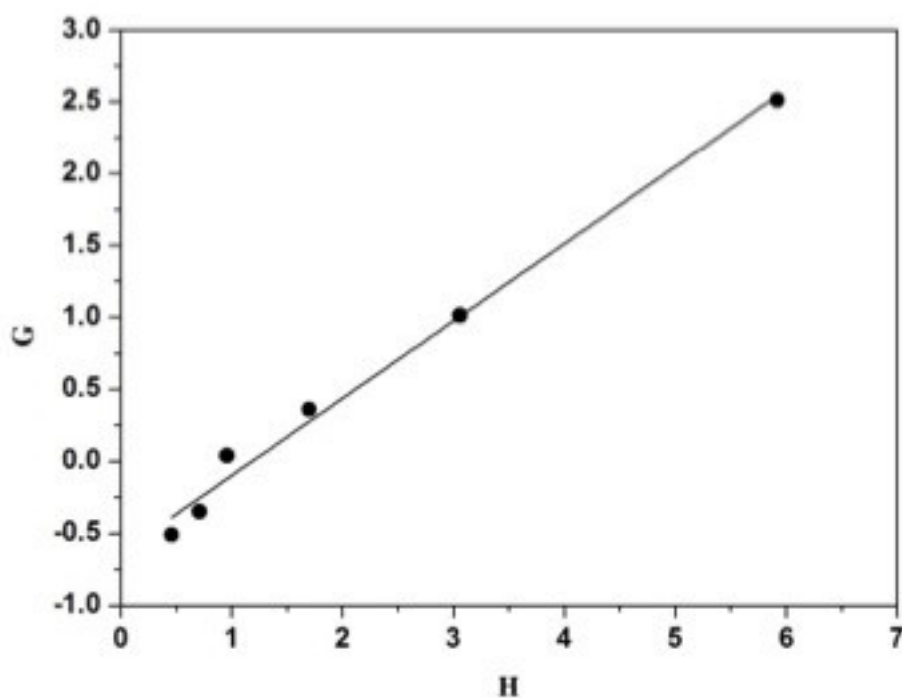

**Figure S4.** Finneman-Ross plot of G vs H.

## VI. Oxidation Characterization

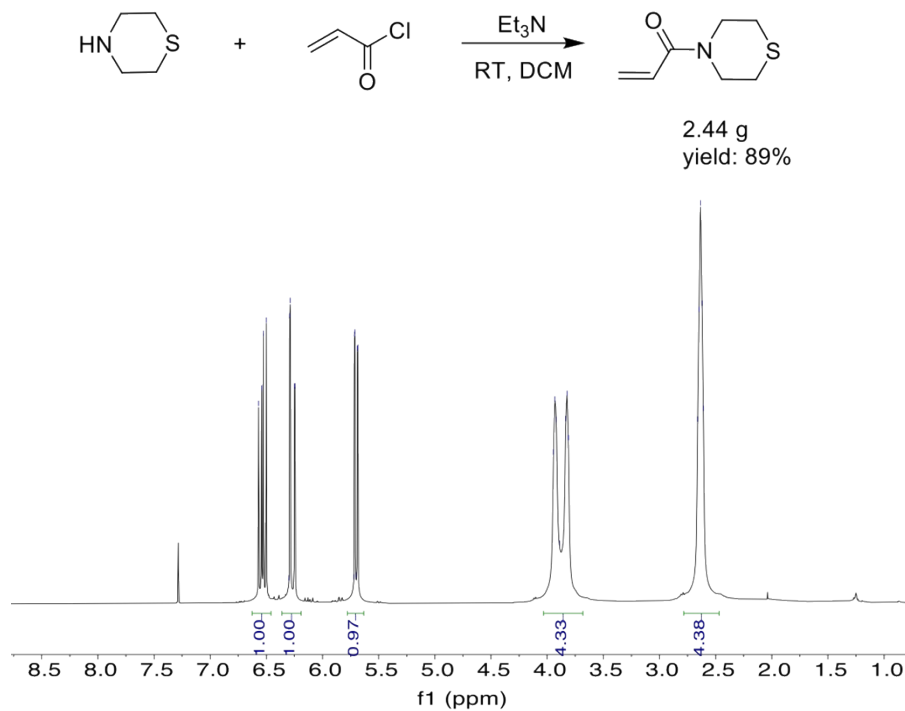

**Figure S5.** Synthesis of NAT monomer and  $^1\text{H}$  NMR spectrum in  $\text{CDCl}_3$ .

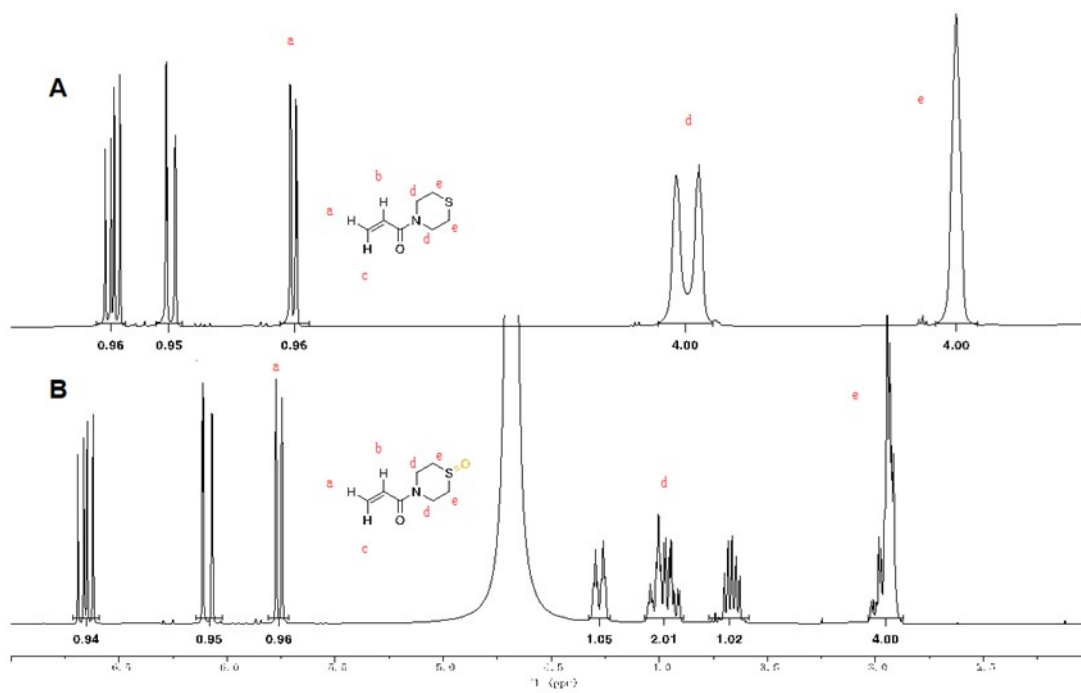

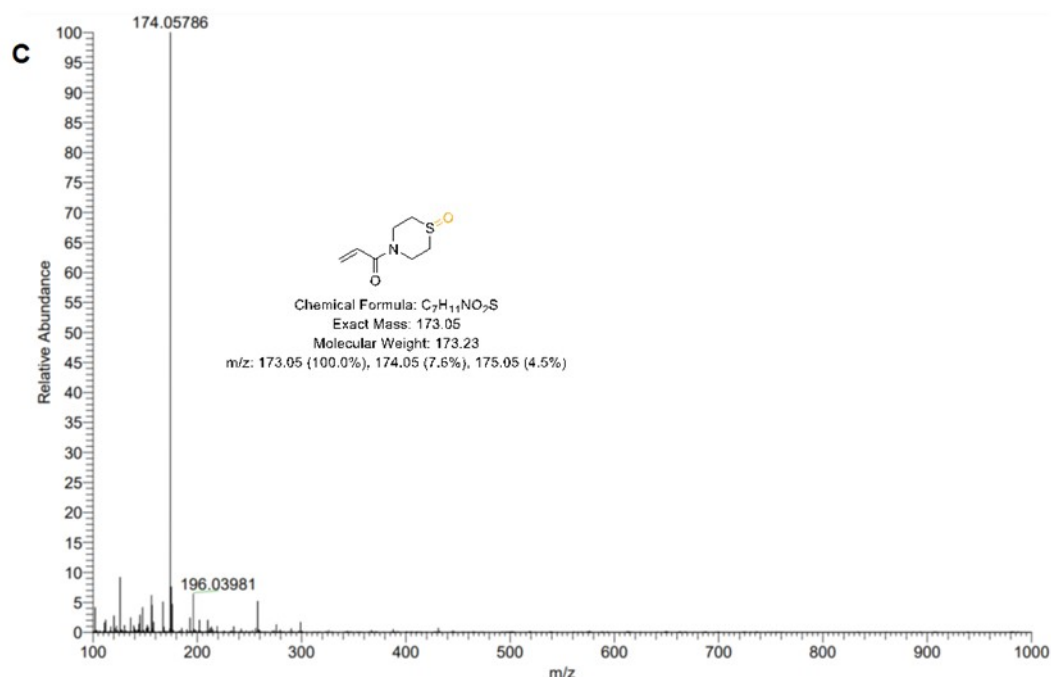

**Figure S6.** Oxidation of NAT in the presence of H<sub>2</sub>O<sub>2</sub>. <sup>1</sup>H NMR spectra in CDCl<sub>3</sub> for (A) NAT and (B) the product after reaction with H<sub>2</sub>O<sub>2</sub>. (C) High-resolution mass spectroscopy for the reaction product.

## VII. Oxidation of poly(DMA-*co*-NAT)

The time-dependent degree of oxidation for P3 and P7 was measured by UV-visible spectrometer. Therefore, solutions of these polymers were prepared by dissolving (1 mg/mL) in deionized water and then mixed with 30 % H<sub>2</sub>O<sub>2</sub> solution (10  $\mu$ L) to adjust the final concentration of H<sub>2</sub>O<sub>2</sub> to 0.1M. The solution was heated at 37  $^{\circ}$ C and UV-visible measurements were performed every 3 minutes.

**Table S6:** calculation the degree of oxidation for P3 based on change in absorbance intensity of P3 during oxidation process.

| Time (min.) | Intensity of absorbance | The change value of absorbance intensity at 310 nm ( $X_{int.} = X_o - X_t$ ) | Degree of oxidation = ( $X_{int} / X_{Total}$ ) * 100 (%) |
|-------------|-------------------------|-------------------------------------------------------------------------------|-----------------------------------------------------------|
| 0           | 0.576                   | 0                                                                             | 0                                                         |
| 6           | 0.569                   | 0.007                                                                         | 10                                                        |
| 9           | 0.540                   | 0.036                                                                         | 51.4                                                      |
| 12          | 0.526                   | 0.050                                                                         | 71.4                                                      |
| 15          | 0.515                   | 0.061                                                                         | 87.1                                                      |
| 18          | 0.507                   | 0.069                                                                         | 98.5                                                      |

|    |       |       |     |
|----|-------|-------|-----|
| 21 | 0.506 | 0.070 | 100 |
| 24 | 0.506 | 0.070 | 100 |

Table S7: calculation the degree of oxidation for P7 based on change in absorbance intensity of P7 during oxidation process.

| Time (min.) | Intensity of absorbance | The change value of absorbance intensity at 310 nm ( $X_{\text{int}} = X_{\text{O}} - X_{\text{I}}$ ) | Degree of oxidation = $(X_{\text{int}} / X_{\text{Total}}) * 100$ (%) |
|-------------|-------------------------|-------------------------------------------------------------------------------------------------------|-----------------------------------------------------------------------|
| 0           | 0.475                   | 0                                                                                                     | 0                                                                     |
| 6           | 0.445                   | 0.030                                                                                                 | 41.6                                                                  |
| 9           | 0.435                   | 0.040                                                                                                 | 55.5                                                                  |
| 12          | 0.424                   | 0.051                                                                                                 | 70.8                                                                  |
| 15          | 0.419                   | 0.056                                                                                                 | 77.8                                                                  |
| 18          | 0.414                   | 0.061                                                                                                 | 84.7                                                                  |
| 21          | 0.410                   | 0.065                                                                                                 | 90.2                                                                  |
| 24          | 0.405                   | 0.070                                                                                                 | 97.2                                                                  |
| 27          | 0.403                   | 0.072                                                                                                 | 100                                                                   |
| 30          | 0.403                   | 0.072                                                                                                 | 100                                                                   |

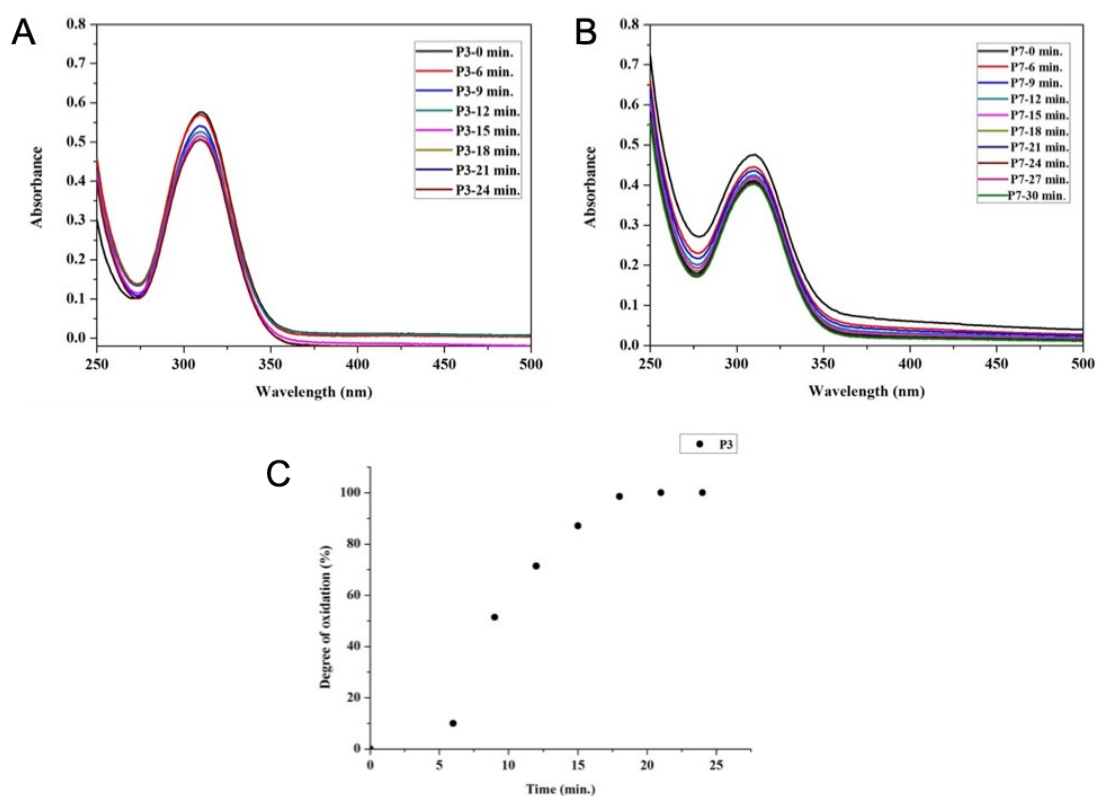

Figure S7. (A) Change of the UV-visible spectrum for P3 during the oxidation with

H<sub>2</sub>O<sub>2</sub> at 37 °C. (B) Change of the UV-visible spectrum for P7 during the oxidation with H<sub>2</sub>O<sub>2</sub> at 37 °C. (C) Measurements of oxidation degree of P3 in the presence of H<sub>2</sub>O<sub>2</sub> corresponding to time of oxidation.

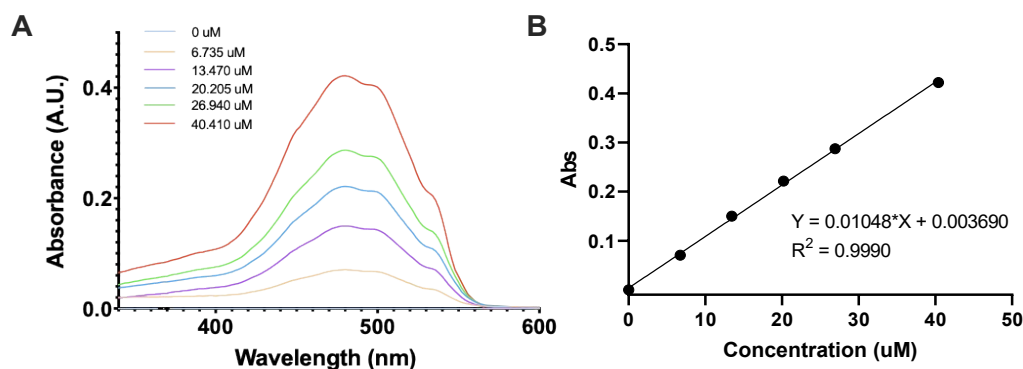

**Figure S7.** Concentration calibration of DOX. (A) UV/Vis spectra of DOX at 0, 6.735, 13.470, 20.205, 26.940, 40.410 μM. (B) Standard curve of DOX concentration derived from the absorbances at  $\lambda = 480$  nm.

## VIII. Reference

- (1) Sobotta, F. H.; Kuchenbrod, M.; Hoepfner, S.; Brendel, J. C. One Polymer Composition, Various Morphologies: The Decisive Influence of Conditions on the Polymerization-Induced Self-Assembly (PISA) of: *N*-Acryloyl Thiomorpholine. *Nanoscale*. **2020**, 12(39), 20171–20176.
- (2) Zhang, Y.; Bradley, M.; Geng, J. Photo-Controlled One-Pot Strategy for the Synthesis of Asymmetric Three-Arm Star Polymers. *Polym. Chem.* **2019**, 10 (35), 4769–4773.
- (3) Fineman M and Ross SD. Linear method for determining monomer reactivity ratios in copolymerization. *Journal of Polymer Science. Polymer Physics Edition*. **1950**, (5), 259-265.
